# Supplementary material for: Toxicity of nanoencapsulated bifenthrin to rainbow trout (Oncorhynchus mykiss)
Source: Royal Society of Chemistry journal article supplement (doi:10.1039/c9en00598f), 2019-01-01
Supplement: c9en00598f1.pdf [file c9en00598f1.pdf]

## Supplemental Information

Table 1. QA/QC measures we use for Bifenthrin.

|            | Level of Quantitation<br>(ug L <sup>-1</sup> ) | Recovery % |      | Spiking Amounts<br>(ug L <sup>-1</sup> ) |     |
|------------|------------------------------------------------|------------|------|------------------------------------------|-----|
|            |                                                | High       | Low  | High                                     | Low |
| Bifenthrin | .026                                           | 96.9       | 91.1 | 26.5                                     | 5.3 |

LOQ is Level of Quantitation.

% recovery is an assessment of the extraction method. To determine, a known amount of the compound of interest is added into a pure matrix (MilliQ water) and the sample run through the extraction protocol, thereby addressing the effects of the extraction process itself.

Spiking amounts indicate at what level the recovery % was calculated. The lower level is what was expected to top be found in a real sample and slightly higher than the LOQ. The higher spike amount is typically ~10x the LOQ.

All Samples are run against a 10-point standard curve to ensure that the GC/MS/MS is reporting standards and samples accurately. Characteristic accuracy for Bifenthrin R<sup>2</sup> was ~0.999
